# Supplementary material for: Generation of a Yeast Cell Model Potentially Useful to Identify the Mammalian Mitochondrial N-Acetylglutamate Transporter
Source: MDPI journal article supplement (doi:10.3390/biom13050808), 2023-05-10
Supplement: s1 [file s1]

**A** Query Length=534

|                                                                      | Score  | E     |
|----------------------------------------------------------------------|--------|-------|
| Sequences producing significant alignments:                          | (Bits) | Value |
| YER069W ARG5,6 SGDID:S000000871, Chr V from 295410-298001, Genome... | 132    | 4e-33 |
| YJL071W ARG2 SGDID:S000003607, Chr X from 306132-307856, Genome R... | 47.8   | 3e-06 |

## B NAGS vs. ARG5/6

Aligned Length = 540    Gapped Segments = 7    Total Mismatches (including gaps) = 430  
Identities = 110 (20.6%)    Similarities = 94 (17.6%)

[illegible]

### C NAGS vs. ARG2

Aligned Length = 579   Gapped Segments = 13   Total Mismatches (including gaps) = 493  
Identities = 86 (15.0%)   Similarities = 88 (15.3%)

[illegible]

**Supplementary Figure S2.** Alignment of human NAGS with yeast *ARG2* and *ARG5/6*.

A, The results of a BLASTP search of SGD database using the human NAGS as query sequence. B, C, ClustalW alignments of human NAGS with yeast *ARG5/6* and *ARG2*, respectively. Similarities and conservative substitutions are shown by asterisks and dots, respectively.
