# Supplementary material for: Generation of a Yeast Cell Model Potentially Useful to Identify the Mammalian Mitochondrial N-Acetylglutamate Transporter
Source: MDPI journal article supplement (doi:10.3390/biom13050808), 2023-05-10
Supplement: s1 [file s1]

|                        |                                                                          |                           |
|------------------------|--------------------------------------------------------------------------|---------------------------|
| Supplementary Table S1 | <div>Oligo sequences used.</div>                                         |                           |
| Arg2_ΔF                | TAGGACCGTCAATCTAGGACACTAGTCGGTTACTTTTATCAGCTGAAGCTTCGTACGCTGCAG          |                           |
| Arg2_ΔR                | AAAACTTGAAAGTTAAGGAGGAGGAGAATGCGTCTTTGTTGCATAGGCCACTAGTGGATCTGATATCAT    |                           |
| Arg7_ΔF                | TTCTATTCCCTTTATTTAAAGAAGTCCAAAATTCAACATAGCAGCTGAAGCTTCGTACGCTGCAG        |                           |
| Arg7_ΔR                | ACCATGCTTATAAAAGAAAGATTGAACAAAATATACATGAATGCATAGGCCACTAGTGGATCTGATATCAT  |                           |
| Arg8_ΔF                | GTTAGAATAATTCAAGAATCGCTACCAATCATGTTTAAAAAGATAGCTGAAGCTTCGTACGCTGCAG      |                           |
| Arg8_ΔR                | CAATCTATACATGACAATTTACAAAGTATATTTAAGCGTAAACGCATAGGCCACTAGTGGATCTGATATCAT |                           |
| Arg2_pRS416_For        | CGACGAGGTACCTTACCACGTAATTCGTGAATGGGGT                                    | 5' KpnI cloning site      |
| Arg2_pRS416_Rev        | CGACGAGGATCCGGCGCCTTACTTTGAGGAGAACG                                      | 3' BamHI cloning site     |
| Arg7_pRS413_For        | CGACGACTCGAGCCACAATATGGATCATGCTAACCATTCTC                                | 5' XhoI cloning site      |
| Arg7_pRS413_Rev        | CGACGAGGATCCGAGCACCAAGTCAGGTTAACATTACGTT                                 | 3' BamHI cloning site     |
| Arg8_pRS416_For        | CGACGAGGATCCTTCGCTAGTATCAGCGGGTCTAGA                                     | 5' KpnI cloning site      |
| Arg8_pRS416_Rev        | CGACGACTCGAGCTCATCATGTTAACACAGAAGGAAAAAGTCA                              | 3' XhoI cloning site      |
| argA_ExFor             | CGACGAGGATCCAACACAATGGTAAAGGAACGTAAAACCGAGTT                             | 5' BamHI cloning site     |
| argA_ExRev             | CGACGAGTCGACCCCTAAATCCGCCATCAACACT                                       | 3' SalI cloning site      |
| argB_ExFor             | CGACGAACTAGTAACACAATGATGAATCCATTAATTATCAAAGTGG                           | 5' SpeI cloning site      |
| argB_HA_ExRev          | CGACGAGAGCTCTTAAGCATAATCTGGAACATCATATGGATAAGCTAAAATCCGCGTACCCAT          | 3' SacI cloning site      |
| argC_ExFor             | CGACGAGGATCCAACACAATGTTGAATACGCTGATTGTGGG                                | 5' BamHI cloning site     |
| argC_ExRev             | CAGCGAGTCGACAATAAGAGACTGCGTTTCCGCA                                       | 3' SalI cloning site      |
| argD_ExFor             | CGACGAGGATCCAACACAATGGCAATTGAACAAACAGCAAT                                | 5' BamHI cloning site     |
| argD_ExRev             | CGACGAGTCGACCGCCCAACCACTTCGCCAC                                          | 3' SalI cloning site      |
| argE_ExFor             | CGACGAACTAGTAACACAAATGAAAAACAAATTACCGCCATTTAT                            | 5' SpeI cloning site      |
| argE_HA_ExRev          | CGACGAGAGCTCTTAAGCATAATCTGGAACATCATATGGATAATGCCAGCAAAAATGGTGAATTA        | 3' SacI cloning site      |
| argA_TEF1_ExFor        | CGACGAGGCGCGCCACACACCATAGCTTCAAAATGTTTC                                  | 5' AscI cloning site      |
| argA_CYC1_ExRev        | CGACGACCTAGGCTTCGAGCGTCCCAAAACC                                          | 3' AvrII cloning site     |
| CYC1_pRS_For           | CGACGACTCGAGGGCGCGCCATCCGCTCTAACCGAAAAGGAAG                              | 5' XhoI/AscI cloning site |
| CYC1_pRS_Rev           | CGACGAGAGCTCCTTCGAGCGTCCCAAAACCT                                         | 3' SacI cloning site      |
