# Supplementary material for: Generation of a Yeast Cell Model Potentially Useful to Identify the Mammalian Mitochondrial N-Acetylglutamate Transporter
Source: MDPI journal article supplement (doi:10.3390/biom13050808), 2023-05-10
Supplement: s1 [file s1]

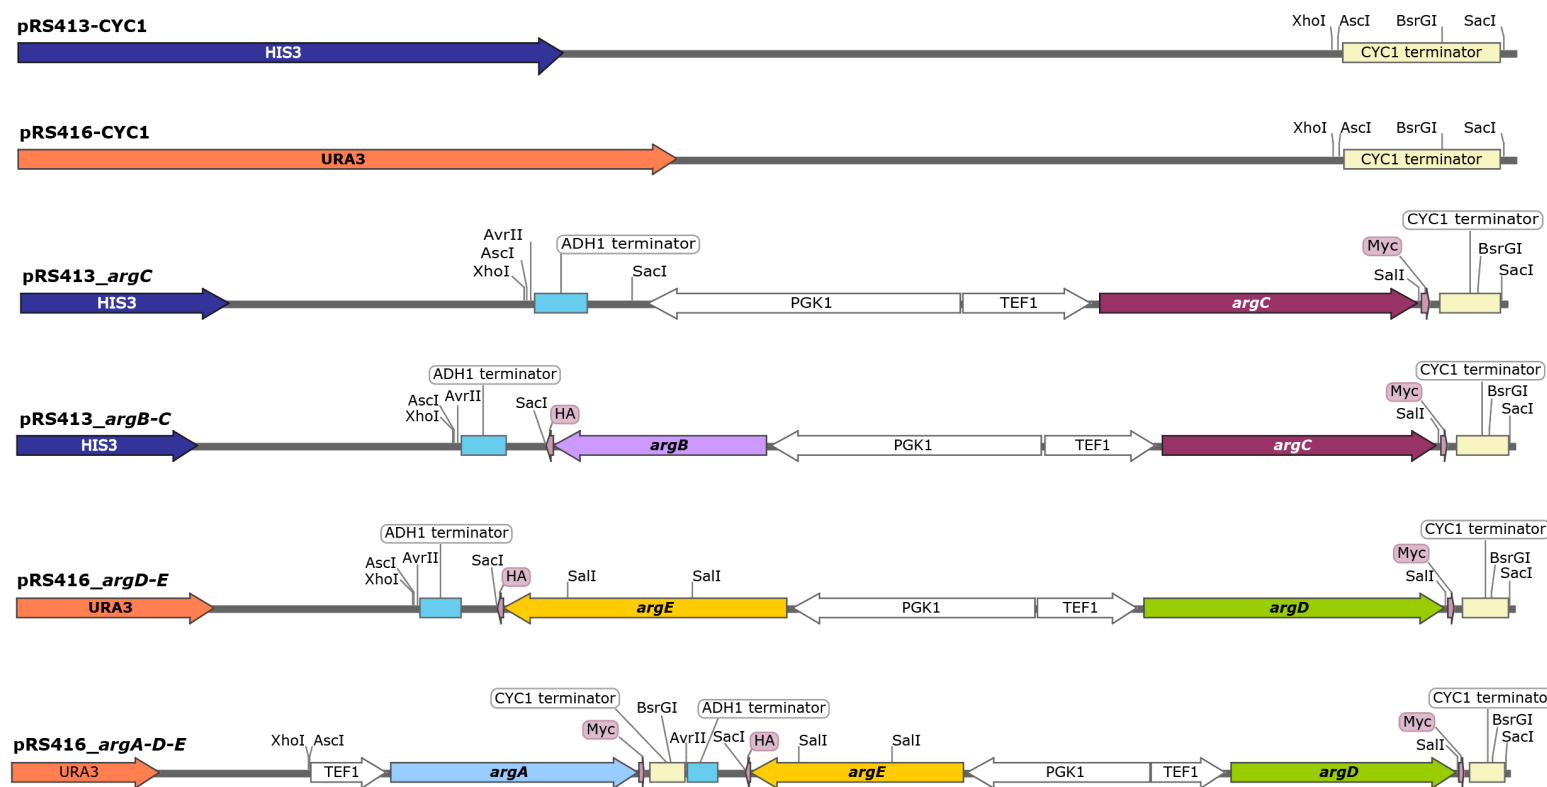

**Supplementary Figure S1.** Schematic representation of the multicopy plasmid constructs. The various pSP-GM2 plasmids containing the strong constitutive TEF1–PGK1 bidirectional promoter and expressing the *E. coli* enzymes (*argA*–*E*) are shown. All plasmids express the *URA3* marker protein except the pSP-GM2\_ *argB*–*C* which expresses the *HIS3* marker protein. The pSP-GM2 constructs carry two unique restriction sites, *AscI* and *AvrII*, downstream the *ADH1* terminator which allow the cloning of a third expression cassette. See details in the text.
